# Supplementary material for: Removal of NO from flue gas using heat-activated ammonium persulfate aqueous solution in a bubbling reactor
Source: Royal Society of Chemistry journal article supplement (doi:10.1039/c6ra01524g), 2016-01-01
Supplement: c6ra01524g1.pdf [file c6ra01524g1.pdf]

# 1 1 The dependence of pH on additive component, additive concentration and temperature

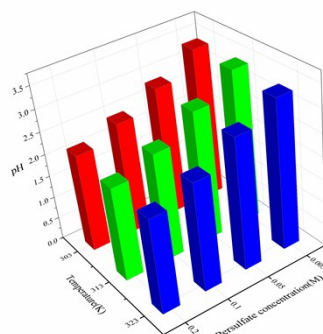

a

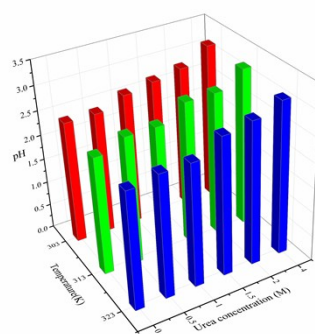

b

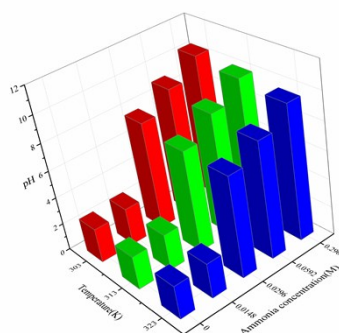

c

Fig. S1 The influence of components, proportion and temperature on the pH a): pH–ammonium persulfate; b) pH–0.1 M ammonium persulfate + urea; c) pH–0.1 M ammonium persulfate + ammonium hydroxide

2 The effects of additive component, additive concentration and temperature on solution pH were  
3 investigated and the results were showed in Figure S1. From Figure S1(a) ~ S1(c), the solution pH in  
4 different solution kept nearly constant with the solution temperature changed. From Figure S1(a), the  
5 solution pH decreased with the ammonium persulfate concentration increased. From Figure S1(b) and  
6 S1(c), with the different molar concentrations of urea and ammonium hydroxide added, the solution pH  
7 was enhanced to some extent. The more the additive concentration was the higher the solution pH was.

1 Besides, the pH of ammonium persulfate + urea aqueous solution enhanced a little while the pH of  
2 ammonium persulfate + ammonium hydroxide aqueous solution changed a lot. It was mainly ascribed  
3 to the strong alkalinity of ammonium hydroxide compared with urea. Without mentioned, all the  
4 concentration and temperature experiments were carried out at initial solution pH in Figure S1.  
5
